# Tackling burden in ART: an integrated approach for medical staff

Jacky Boivin<sup>1,\*</sup>, Alice D. Domar<sup>2</sup>, Daniel B. Shapiro<sup>3</sup>,  
Tewes H. Wischmann<sup>4</sup>, Bart C.J.M. Fauser<sup>5</sup>, and Christianne Verhaak<sup>6</sup>

<sup>1</sup>Cardiff Fertility Studies Research Group, School of Psychology, Cardiff University, Tower Building, Park Place, CF10 3AT, Cardiff, Wales, UK

<sup>2</sup>Domar Center for Mind/Body Health, Boston IVF, Harvard Medical School, Waltham, MA, USA <sup>3</sup>RBA Frozen Donor Egg Bank/Egg donation Services, Reproductive Biology Associates, Atlanta, GA, USA <sup>4</sup>Institute of Medical Psychology, Center for Psychosocial Medicine, Heidelberg University Hospital, 69115 Heidelberg, Germany <sup>5</sup>Department of Reproductive Medicine and Gynecology, University Medical Center Utrecht, 3584 CX Utrecht, The Netherlands <sup>6</sup>Clinical Psychologist & Psychotherapist, 818 Department of Medical Psychology, Radboud University Nijmegen Medical Center, PO Box 9101, 6500 HB Nijmegen, The Netherlands

\*Correspondence address. Tel: +44-2920-876707; Fax: +44-2920-874858; E-mail: boivin@cardiff.ac.uk

**ABSTRACT:** Discontinuation is a problem in fertility clinics. Many couples discontinue assisted reproductive technologies (ART) without achieving a live birth for reasons other than poor prognosis or the cost of treatment. Discontinuation has been attributed to the burden of treatment. The causes of burden can be broadly classified according to whether they originate in the patient, clinic or treatment. Interventions to alleviate these burdens include provision of comprehensive educational material, screening to identify highly distressed patients, provision of tailored coping tools and improvements in the clinic environment and medical interventions. Practical interventions to reduce the different causes of burden in ART exist, but further development and evaluation of the efficacy of these interventions requires more precise definition of terms and theory. In this paper, we propose a general integrated approach to cover different perspectives in dealing with burden in ART clinics. We firstly describe the integrated approach and present common sources of burden. We then describe interventions that could help reduce the burden in ART. Our paper is aimed at fertility clinic staff because of their day-to-day involvement with patients. However, this discussion should also be relevant to companies that develop treatments and to psychosocial experts. Reducing the burden of treatment should lead to improved outcomes, namely better quality of life during treatment and lower discontinuation rates.

**Key words:** assisted reproductive technology / *in vitro* fertilization / psychological / discontinuation / psychosocial interventions

## Introduction

Assisted reproductive technologies (ART) such as IVF provide an opportunity for patients to realize their goal of parenthood with cumulative pregnancy rates nearing 70% (Pinborg *et al.*, 2009). However, many couples discontinue ART without achieving a live birth for reasons other than poor prognosis or cost of treatment. In some cases this decision is satisfactorily achieved after deliberation about beliefs, values and perceived opportunities and costs of treatment (Elwyn *et al.*, 2000). In other cases the decision to discontinue is reluctantly made as a direct consequence of the burden of treatment. Whilst discontinuation in such cases may reflect patients' incapacity to deal with the demands of treatment, recent research also points to non-patient factors (e.g. clinic factors, nature of treatments) that add to the burden of treatment and that make treatment more onerous than necessary. Such findings bring into focus the need for medical teams and pharmaceutical companies to consider their role in the treatment experience. In this opinion paper, we propose a general integrated approach to cover different perspectives in dealing with burden in ART clinics. We firstly describe the integrated

approach and present common sources of burden. We then describe interventions that could help reduce the burden in ART. Our paper is aimed at fertility clinic staff (e.g. nurses, doctors, embryologists, administrators) because of their day-to-day involvement with patients. However, this discussion should also be relevant to companies that develop treatments and to psychosocial experts. Reducing the burden of treatment should lead to improved outcomes, namely better quality of life during treatment and lower discontinuation rates.

## Patients, clinics and treatments: reciprocal influences

Discontinuation (dropout) in fertility treatment refers to patients with a failed cycle who opt not to proceed with further treatment despite a favourable prognosis and ability to pay or cover the costs of treatment. Discontinuation is most often discussed in the context of ART and has been identified as an issue in ART as early as 1988 (Callan *et al.*, 1988). (Discontinuation can also refer to people who opt not to start treatment, but in the literature reviewed it mainly refers to patients having

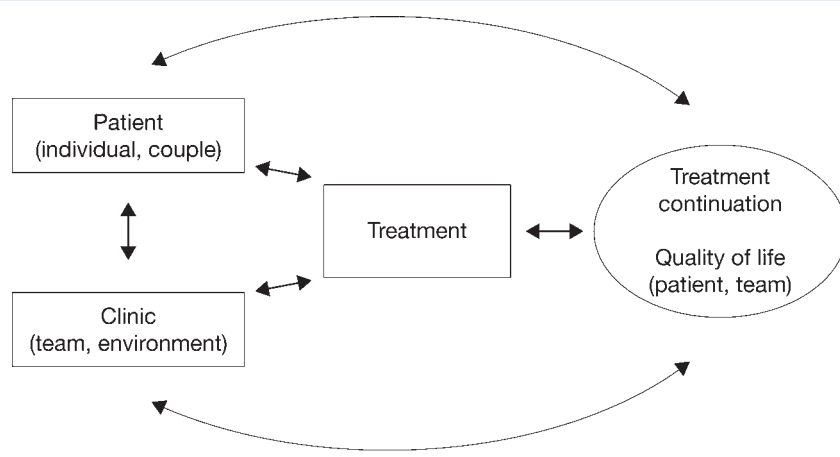

**Figure 1** Integrated approach showing reciprocal influences among patient, clinic and treatment in influencing treatment continuation and quality of life.

undergone at least one treatment cycle.) Discontinuation rates vary significantly among studies from as low as 7.7% (Verberg *et al.*, 2008) to as high as 89% (Sharma *et al.*, 2002), and even among the better-controlled studies the rates are in the range of 24–35% (e.g. Land *et al.*, 1997; Olivius *et al.*, 2004; Smeenk *et al.*, 2004; Brandes *et al.*, 2009). Heterogeneity is due to factors beyond the scope of this paper (e.g. heterogeneous definitions of discontinuation, methodological approaches, patient groups and/or treatment types). Despite this heterogeneity, the discontinuation literature does make clear that the patient (individual, couple), the clinic (team, environment) and the treatment (type, effect) all have reciprocal influences on each other in determining willingness to continue with treatment. This state of affairs suggested to us that in order to fully address discontinuation and other important outcomes in fertility treatment (e.g. quality of life for patients and staff), one would need an integrated approach that takes into account these reciprocal influences (i.e. patients, clinics, treatments). Figure 1 illustrates this integrated conceptualization. Reciprocal influences might be, for example, that pre-existing emotional problems originating in the patient (e.g. depression) add to the burden of providing treatment to these patients (Verhaak *et al.*, 2010) but (conversely) that depression can also be a consequence of the many demands treatment makes on people (Boivin and Takefman, 1996). Staff can cause emotional distress in patients because of the bad news they must deliver (e.g. failed stimulation, Boivin, 2000) but patient reactions to this bad news can cause problems for staff (e.g. distress, time demand, Simpson and Bor, 2001).

The [causal] pathways depicted in Fig. 1 (i.e. double-headed arrows) have not received equal research or clinical attention. In the psychosocial literature much more is known about treatment impacts on patient well-being (Verhaak *et al.*, 2007) and stress effects on the treatment outcome (Boivin *et al.*, 2011a) than about the impact of treatment delivery on clinic staff (e.g. morale when treatment is not successful, Harris and Bond, 1987). In the medical literature more attention has been spent on improving pregnancy rates (Leushuis *et al.*, 2009) than on reducing secondary effects of medication on patient well-being (Verberg *et al.*, 2009). To optimize the treatment experience for patients and medical teams, we need to

examine the patient and the clinic and the treatment to identify from within these domains what could be the causes of burden. We use the discontinuation literature to achieve this goal insofar as we infer that the factors that lead to discontinuation are likely to also shed light onto the burdensome aspects of treatment that can eventually be minimized or even eliminated. Minimizing burden should ultimately lead to improved outcomes, for example reduced discontinuation or improved quality of life during treatment to name but a few. However, future research will be required to test this hypothesis.

## What are main causes of discontinuation in ART?

### *Patient (individual, couple) factors*

Table 1 lists three patient factors commonly linked to discontinuation in the literature: (i) fear and negative treatment attitudes; (ii) psychological and emotional factors; and (iii) relational strain. In 1391 couples with suspected fertility problems, about 25% discontinued due to negative attitudes to treatment, with 70% of these patients dropping out before undergoing first-line treatments (ovulation induction, insemination) and 30% before starting ART (Brandes *et al.*, 2009). In studies that describe these attitudes, 26% of patients ended treatment due to a fear of complication or 'possible danger' of treatment (Moini *et al.*, 2009). Fear and negative treatment attitudes have been shown to be particularly important considerations when initiating treatment and/or moving on to new types of treatment (White *et al.*, 2006; Bunting and Boivin, 2007). This early influence of attitude is potentially because it is at such points that people consider the match between personal beliefs and values before opting in or out of proposed treatment options.

Psychological factors have been cited as a main cause of discontinuation, with a considerable range in frequency between studies (e.g. 7.4%, Verhagen *et al.*, 2008 to 52% Van den Broeck *et al.*, 2009) due to imprecise definitions and study methods (Osmanagaoglu *et al.*, 1999; Hammarberg *et al.*, 2001; Olivius *et al.*, 2004; Domar *et al.*, 2010). Intense negative emotions are difficult to tolerate for extended periods of time and ending treatment may be a way of

**Table 1** Factors cited by patients as contributing to their decision to end treatment

| Patient (individual, couple)                                                                                                                                                                                                                                                                                                                                                                                                                                                                                                                                                                                                                                                                                                                                                                                                                                                                | Clinic (team, environment)                                                                                                                                                                                                                                                                                                                                                                                                                                                                                                                                                                                                                                                          | Treatment                                                                                                                                                                                                                                                                                                                                                                                                                                     |
|---------------------------------------------------------------------------------------------------------------------------------------------------------------------------------------------------------------------------------------------------------------------------------------------------------------------------------------------------------------------------------------------------------------------------------------------------------------------------------------------------------------------------------------------------------------------------------------------------------------------------------------------------------------------------------------------------------------------------------------------------------------------------------------------------------------------------------------------------------------------------------------------|-------------------------------------------------------------------------------------------------------------------------------------------------------------------------------------------------------------------------------------------------------------------------------------------------------------------------------------------------------------------------------------------------------------------------------------------------------------------------------------------------------------------------------------------------------------------------------------------------------------------------------------------------------------------------------------|-----------------------------------------------------------------------------------------------------------------------------------------------------------------------------------------------------------------------------------------------------------------------------------------------------------------------------------------------------------------------------------------------------------------------------------------------|
| <p>Fear and negative treatment attitudes</p> <ul style="list-style-type: none"><li>• Unfavourable attitudes to treatment (e.g. fear about health of baby, perceiving treatment to be unnatural, perceived costs)</li><li>• Values (ethical, moral) and preferences incompatible with treatment</li><li>• Idiosyncratic barriers</li></ul> <p>Psychological and emotional factors</p> <ul style="list-style-type: none"><li>• Pre-ART psychological profile</li><li>• Difficulty in tolerating negative emotions for extended time periods</li><li>• Uncertainty</li><li>• Strain of repeated ART cycles</li></ul> <p>Relational strain</p> <ul style="list-style-type: none"><li>• Fear that ART will negatively impact relationship</li><li>• Perceived and actual asymmetry in treatment focus between partners (particularly prevalent in early phases of medical involvement)</li></ul> | <p>Sub-optimal organizational care</p> <ul style="list-style-type: none"><li>• Stressful care (disorganized, assembly-line treatment, different staff on clinic visits)</li><li>• Insufficient information on alternatives, inadequate co-ordination</li><li>• Depersonalization (poor coordinated follow-up, results at work and without partner present)</li><li>• Lack of continuity of care and negative doctor attitudes</li><li>• Overly bureaucratic procedures</li></ul> <p>Negative staff-patient interactions</p> <ul style="list-style-type: none"><li>• Lack of empathy, poor listening skills, insufficient care of the man, insufficient time for questions</li></ul> | <p>Physical burden</p> <ul style="list-style-type: none"><li>• Worry about physical burden, physical symptoms and discomfort</li><li>• Injection protocols and adherence to treatment</li><li>• Cycle monitoring</li><li>• Disruption of work and daily activities</li><li>• Worry about cost</li></ul> <p>Handling of poor prognosis</p> <ul style="list-style-type: none"><li>• Loss of hope for success (cycle number dependent)</li></ul> |

copied with these emotions (Lazarus and Folkman, 1984). Studies mainly lack specificity about the psychological cause of discontinuation, for example: 'psychologically too stressful' (Osmanagaoglu *et al.*, 1999), 'psychological burden' (Olivius *et al.*, 2004; Domar *et al.*, 2010), 'psychological reasons' (Smeenck *et al.*, 2004), 'emotional costs' (Hammarberg *et al.*, 2001) and 'emotional exhaustion' (Daniluk, 2001). Where specificity exists, the potential for treatment failure and the strain of the 2-week waiting period are consistently reported as foremost compared with other aspects of treatment consistent with other research on treatment reactions (Boivin and Takefman, 1995). For example, 40% of patients rate the waiting period as the most stressful aspect of treatment compared with 13 and 15% stating pain/physical discomfort or disruption to daily routine, respectively (Benyamini *et al.*, 2005). Ending treatment because of distress may be especially likely for those who start treatment at a psychological disadvantage. Smeenck *et al.* (2004) reported that elevated pretreatment depression was the strongest predictor of patient-driven discontinuation in the first three ART cycles, and this link has been reported elsewhere (Strauss *et al.*, 1998).

Relational strain is also a frequently reported reason for discontinuing treatment (Strauss *et al.*, 1998; Daniluk, 2001; Verhagen *et al.*, 2008; Brandes *et al.*, 2009; Van den Broeck *et al.*, 2009). Withdrawal from treatment due to relational problems often occurs in the early phases of medical involvement, for example, before or after diagnosis (Brandes *et al.*, 2009) and while on the waiting list for treatment (van Dongen *et al.*, 2010). Anecdotally this has been reported to mean that only the stronger marriages survive the demands of treatment. Strauss *et al.* (1998) found in a prospective study that couples discontinuing treatment within 6 months of a failed cycle reported more relational strain (e.g. more concern about the impact of treatment failure on marriage, more unresolved couple conflicts) than those continuing, and similar findings were reported for donor insemination (Schover *et al.*, 1992). In contrast, Smeenck *et al.* (2004) found no relationship

between marital satisfaction and discontinuation (12-month follow-up), suggesting that it is strain rather than appraisal of the relationship that is critical. Others have reported that asymmetry in decision-making between spouses (e.g. worry and preoccupation with treatment or planning (Merari *et al.*, 2002) is related to strain and discontinuation (Daniluk, 2001).

*Clinic (team, environment) factors*

Numerous aspects of quality of care have been reported in connection with discontinuation (see Table 1). Stressful organizational care (e.g. clinic disorganized, assembly-line treatment, never the same staff; Olivius *et al.*, 2004), inadequate provision of information and inadequate coordination of care (Haagen *et al.*, 2008) have been cited as reasons for ending treatment. Follow-up studies on the well-being of patients show that these organizational problems make patients feel depersonalized (Daniluk, 1997). For example, in a study on communicating ART results, about half of the patients received pregnancy test results when at work and two-thirds when their partner was not present, which was perceived to be stressful (Groh and Wagner, 2005). Fertility staff can suffer from poor organizational care themselves, with time pressure (Simpson and Bor, 2001) and work overload as the main problems (Harris and Bond, 1987). In 112 ART centres in the USA, 49% of physicians, 74% of administrators and 64% of staff agreed that the clinic environment was stressful (Gerson *et al.*, 2004). Such pressures can mean that medical teams feel they cannot deliver the standard of care they would want and this probably affects patient perceptions of the treatment team. Indeed variations on 'assembly-line treatment' or 'too long waiting periods' are a common cause of patient dissatisfaction (Dancet *et al.*, 2010). Discontinuation due to moving to another clinic has been reported in several studies (Osmanagaoglu *et al.*, 1999; Verhagen *et al.*, 2008; Akyuz *et al.*, 2010; Domar *et al.*, 2010) and could also reflect dissatisfaction with the quality of care.

Problematic interactions, mainly communication, with fertility staff have also been cited in discontinuation studies. In a recent systematic review, there were variable findings about the quality of interactions between patients and fertility staff (Dancet et al., 2010). Patients in discontinuation studies have cited, for example, 'lack of empathy' (Olivius et al., 2004); negative interactions with staff (Rajkhowa et al., 2006); and poorly formulated explanations of healthcare plans (Meynol et al., 1997). In a Swedish study, a third of patients cited staff inability to deal with patient distress and need (e.g. lack of empathy, poor listening skills, insufficient care of the man, unkind treatment) as causal factors in their decision to end treatment (Olivius et al., 2004). The lack of specificity of most terms makes it difficult to ascertain causes but evidence suggests that it is mainly related to organization of care and communication (Souter et al., 1998; Malin et al., 2001; Schmidt et al., 2005).

Doctors, nurses and patients do not perceive the physical and psychological demands of treatment in the same way. When compared with patients, doctors tend to underestimate the strain of procedures/events (e.g. diagnostic tests, oocyte pick-up, cancelled cycles), whereas nurses tend to overestimate (Kopitzke et al., 1991). Discontinuation is another problem context where perspectives differ. One study observed that 30% of patients who cited poor prognosis as a reason for discontinuation actually had a favourable prognosis according to their doctors, suggesting that patients may lose hope for success before the medical staff do (Malcolm and Cumming, 2004) and/or that they define a 'poor prognosis' differently. Willingness-to-pay studies show that patients derive benefit from undergoing ART even if they do not achieve success because having tried reduces feelings of regret from not trying options that could have helped them become parents (Ryan, 1996). An early ART study reported that staff found the impossibility of getting all patients pregnant a primary source of difficulty in their job (Harris and Bond, 1987). The wish to do all for the patient may sometimes get in the way of seeing that the patient just wants to end treatment. Alternatively, discrepancy in perceptions of prognosis may represent genuine communication errors that need to be addressed.

### *Treatment factors*

Treatment is physically demanding and patients have been known to end treatment for this reason (see Table I). What is understood by 'physical' varies between studies. The 'physical burden' of treatment (e.g. breast tenderness, pain at oocyte pick-up) can be significant, and a cause of worry, and be more pronounced than emotional distress (Boivin and Takefman, 1996; Franco et al., 2002; Klonoff-Cohen and Natarajan, 2004). Treatment procedures are worrying for many patients. For example, 20% of women were worried about injections (Franco et al., 2002) and 28% ranked giving injections as one of the most difficult topics for them to discuss with their partner (Cousineau et al., 2006). A qualitative study showed that fertility care providers were also concerned about adherence to stimulation protocols (Huisman et al., 2009), cycle monitoring and feedback (Boivin, 2000). It is noteworthy that despite the physical burden of stimulation and oocyte pick-up, patients report feeling overwhelmingly optimistic (Boivin and Takefman, 1996) and much less distressed than in the 2-week waiting period (Boivin and Lancaster, 2010). Attending the clinic and integrating treatment schedules (e.g. scans, blood tests) with work, family and social activities can disrupt daily activities

(Klonoff-Cohen and Natarajan, 2004; Benyamini et al., 2005; Brod et al., 2007, 2009) and can add to emotional distress (Benyamini et al., 2005). The most comprehensive prospective study to date indicated that 62% of patients reported IVF-related absence from work resulting in productivity loss of about €845 (greater for women with emotional problems) (Bouwman et al., 2008). Finally, the cost of treatment is a well-documented cause of stress and worry (Domar, 2004; Rajkhowa et al., 2006; Van den Broeck et al., 2009; Eisenberg et al., 2010).

Although these causes of burden represent important intervention targets willingness-to-pay studies show that patients are willing to trade off costs (e.g. administration ease, minor physical side effects, disruption to daily life) against gains in effectiveness, even marginal gains of 1–2% in the pregnancy rate (Palumbo et al., 2011). Further, this study found that patients would be willing to trade off these costs for a more reassuring communication experience with their treating physician, in particular shared decision-making about treatment options. The use of willingness-to-pay methods shows that patients are willing to put up with discomforts of treatment for the chance of parenthood but also could help identify which aspects of treatment are potential priority areas for improvement.

In this section, we have highlighted patient, clinic and treatment factors linked to discontinuation that shed light on what seems to make fertility treatment burdensome for patients. It is clear that much more work needs to be done to fully specify causes of burden linked to model domains presented in Fig. 1, particularly clinic and treatment domains. However, in the following section we use these findings to describe how interventions could be selected and implemented at different time points to minimize burden to ultimately lead to better outcomes (e.g. reduced discontinuation, improved quality of life).

## **What techniques could lessen the burden of treatment (and thereby reduce discontinuation and improve quality of life)?**

Identifying the specific challenges in each domain (patient, clinic, treatment) will allow us to develop tailored interventions that have high 'goodness-of-fit' and more potential to optimize the treatment experience. Tailored interventions in other health areas have been found to be more effective than general interventions (Noar et al., 2007). Figure 2 shows specific problems during treatment according to the treatment stage and the domain (e.g. patient, clinic, treatment) matched with potential interventions, which shows how there could be better compatibility between the problems identified in the previous section and the types of interventions implemented in clinics. Figure 2 presents as a series of discrete interventions, but we recognize that greater synergy or benefit would probably be derived if these were integrated into a complex intervention. By a complex intervention we mean one that includes a number of the aforementioned components (e.g. coping, communication), and/or requires complex action from the person receiving or delivering the intervention (e.g. skill acquisition) and/or targets multiple outcomes (e.g. discontinuation, quality of life, ease of treatment administration) and/or requires effort at multiple organizational levels (e.g. clinic, industry) (Craig et al., 2008). Further, whether simple or complex the feasibility, acceptability and efficacy of the intervention would need to be evaluated. Figure 2 is



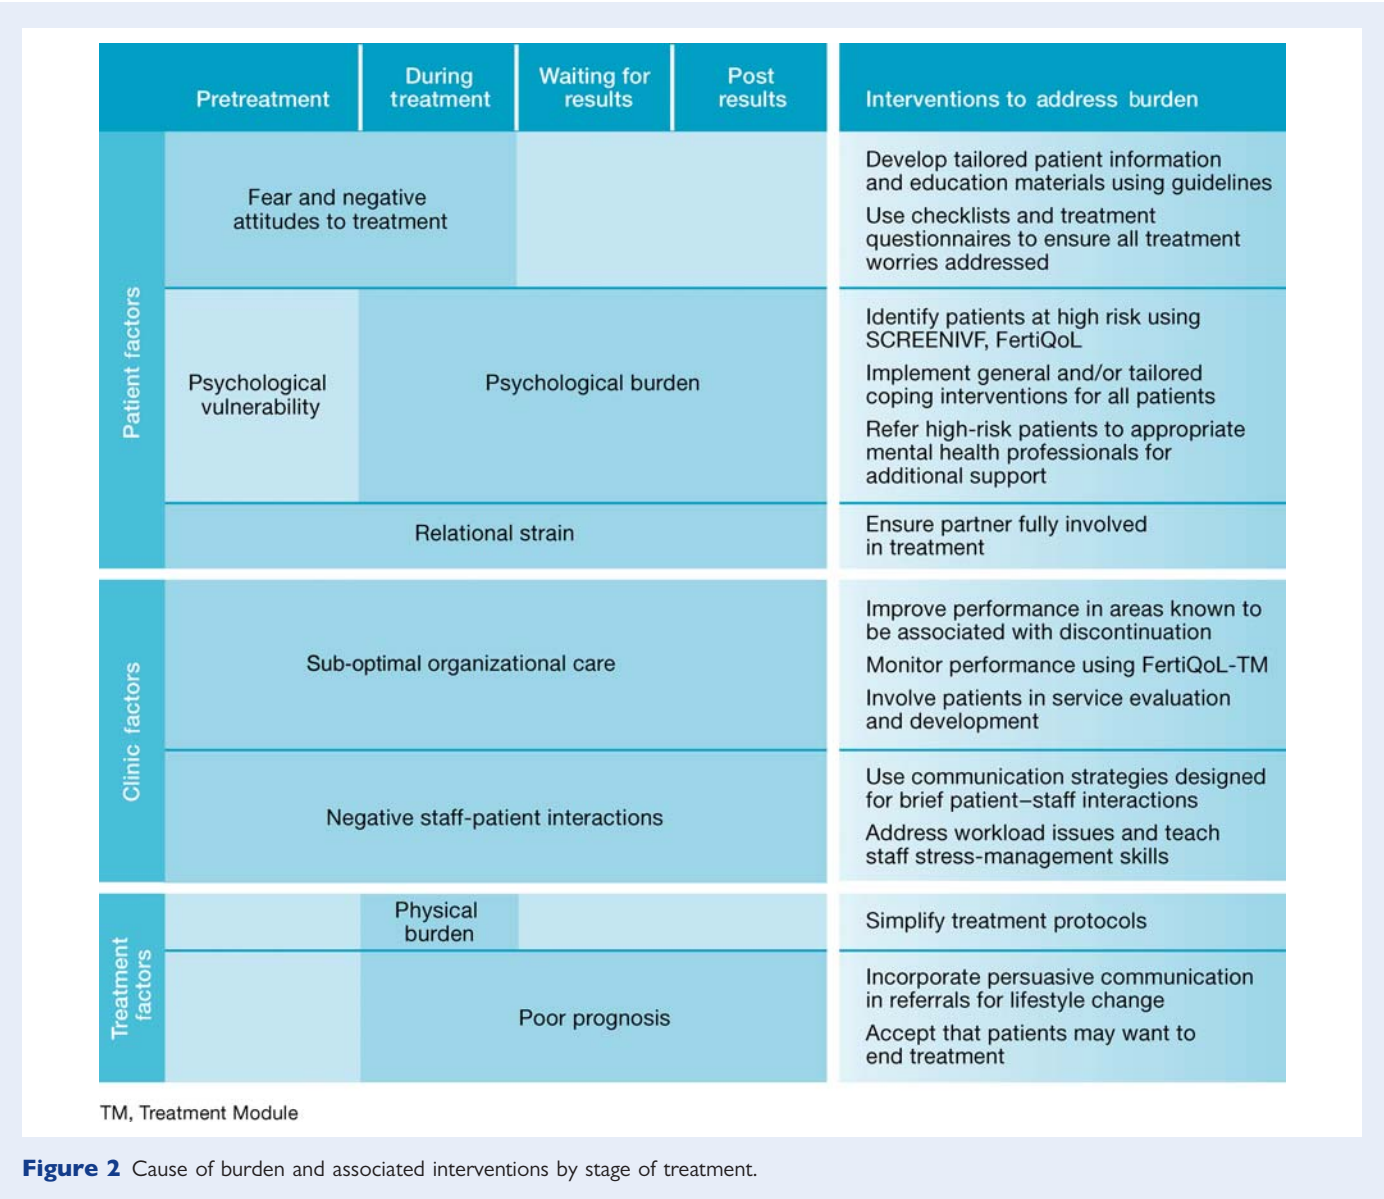

therefore a starting point of what could be implemented but we recognize that the key stakeholders (e.g. patients, clinicians, researchers and pharmaceutical industry) will have to work together to develop, implement and evaluate intervention packages in fertility health care.

*Targeting patient factors*

There seems to be a clear need for educational interventions to address erroneous patient fears (e.g. worry about health of baby) and misconceptions (e.g. dangers about specific ART procedures) and to better prepare patients for the demands and potential success of treatment (e.g. realistic expectations). Improving the quality of information is one of the easiest ways to improve patient experiences (Dancet et al., 2010), but this simple strategy has not consistently been adopted. In a survey of 2698 couples attending 16 clinics in the Netherlands only 57% received the detailed information recommended by national guidelines (Mourad et al., 2009). In the USA, 50.8% of fertility clinic websites fail to meet any of the minimal quality standards for printed medical information (Okamura et al.,

2002). Therefore one way to optimize the treatment experience at relatively low cost is to ensure that clinic education material is developed according to quality criteria (Bunge et al., 2010) which could include, for example, using structured checklists or treatment surveys (e.g. Treatment Module FertiQoL, Klonoff-Cohen and Natarajan, 2004; Mourad et al., 2009; Boivin et al., 2011b) to ensure that common misconceptions and worries about treatment are addressed; incorporating knowledge about the impact of cultural/religious perspectives in treatment discussions (Schenker, 2005; Adamson, 2009); and developing educational material in collaboration with patients for maximum fit (Pook and Krause, 2005). One caveat is that the quantity of information should be in line with what is needed at a particular stage of treatment because too much information has been shown to attenuate the benefits of an educational intervention in the diagnostic phase of infertility treatment (Takefman et al., 1990). It should be noted that staff can benefit from educational interventions too, for example learning more about the impact of providing feedback about treatment progress on patient reactions (Boivin, 2000)

or about emotional reactions during treatment that may make treatment delivery more difficult for them (Verhaak et al., 2007; Boivin and Lancaster, 2010).

Psychological burden is a cause of discontinuation that is partly caused by patient history (for example, psychological vulnerability) and partly by demands of treatment. Clinics need to address both aspects to optimize treatment. The team can best help the highly distressed patient entering treatment by identifying them and then referring them to a mental health professional who, together with the patient, will formulate adjunct support plans during treatment (Ningel and Strauss, 2002; Hammer Burns and Covington, 2006; Wischmann et al., 2009). Two short tools to detect at-risk fertility patients already exist, SCREENIVF and FertiQoL. SCREENIVF is a 34-item questionnaire covering five risk indicators for high distress in ART (pretreatment depression and anxiety, negative infertility illness cognitions, low acceptance of infertility and poor social support) (Verhaak et al., 2005). A positive screen prospectively showed a minimum 3-fold increase in the risk of poor adjustment at the end of treatment (Verhaak et al., 2010). FertiQoL consists of 26 items about the impact of infertility in four core domains (emotional, mind/body, relational, social) and has been translated into 22 languages [www.fertiqol.org, (Boivin et al., 2011b)]. FertiQoL is reliable, significantly correlates to patient-centred care (Aarts et al., 2011a) and significantly discriminates between depressed and non-depressed patients on the Hospital Anxiety and Depression Scales (Aarts et al., 2010). Screening may also detect couples experiencing high relational strain (Pasch, 2001). However, more research on screening for marital strain needs to be carried out.

The procedural strain of treatment (e.g. uncertainty, tension, worry) also needs to be addressed. Recent reviews on psychosocial interventions delivered by mental health professionals have demonstrated that interventions reduce anxiety (Boivin, 2003) and depression (de Liz and Strauss, 2005) and can have a small but reliable effect on pregnancy rates, which may be due to behavioural change (e.g. lifestyle, treatment continuation) rather than a change in emotions (Hämmerli et al., 2009), but there is some inconsistency between reviews. Psychological interventions designed to improve stress management skills showed in a prospective, controlled, single-blind, randomized study that mind/body techniques were associated with decreased anxiety and depression, fewer physical symptoms and increased pregnancy rates in infertile women compared with a control group, but this effect depended on the number of sessions attended (Domar et al., 2011). Self-administered coping interventions for the waiting period have also been developed. The Positive Reappraisal Coping Intervention (PRCI) comprises 10 positive reappraisal statements designed to promote active attempts to reappraise the waiting period before the pregnancy test in a more positive light (Lancaster and Boivin, 2008). It consists of a small card with 10 statements on it that patients are instructed to read once in the morning, once in the evening and at any other time they need it. Compared with an attention and mood control group, PRCI patients reported feeling significantly more positive, felt that PRCI helped them carry on during the waiting period, and were more able to make plans for the future (Lancaster and Boivin, 2008). Ensuring that clinic staff involve the partner more in treatment plans could also help ease relational strain (Pasch, 2001) because lack of partner involvement is a major source of dissatisfaction with service delivery in clinics. Interventions

for the semen analysis (Pook and Krause, 2005) and even interventions to assist in more global lifestyle change have been developed (Moran et al., 2006). Many more interventions exist (e.g. online interventions, Aarts et al., 2011b) and clinics should familiarize themselves with the interventions that can practically be implemented in their setting. However, it should be reiterated that many of these interventions still require more evaluation to fully ascertain their value, as has been noted previously (Wischmann, 2008).

#### Targeting clinic factors

We are not the first to advocate a change in the clinic environment as an essential way to promote better quality of care (Alper et al., 2002; Gerson et al., 2004; Dancet et al., 2010). Change may be slow in coming because it is difficult to translate results of patient satisfaction surveys into improved quality of care without greater specificity of the cause of dissatisfaction (Riiskjaer et al., 2010). Further, less research has been devoted to reducing the burden of treatment by effecting change in clinic procedures and/or treatment protocols than change in the patient. Therefore the clinic and treatment factor sections are still at an embryonic stage. Nevertheless, we use what can be gleaned from the discontinuation and patient satisfaction literature to suggest possible targets for improvement. Dancet et al. (2010) performed a systematic review of 51 fertility patient satisfaction studies. From these they identified domains where there was consensus across the 51 studies that patients felt the domain was important to fertility care and problematic (i.e. level of satisfaction low). These findings could be used to identify problem areas that cause treatment to be more onerous and where clinics could target efforts to improve the patient experience. The domains were: (i) access to care (e.g. time for referral and treatment, frequency of appointments); (ii) staff technical skills (e.g. ability of staff to provide comprehensive treatment/testing in one clinic, quality of service provision); (iii) coordination, integration and continuity of care (e.g. staff turnover); (iv) information, communication and education (e.g. about alternatives to treatment, how to help oneself, making plans for the future); (v) emotional support and alleviation of fear and anxiety; and (vi) physical comfort (separate clinics from pregnant women) (Dancet et al., 2010). Clinics can also evaluate their own service using existing tools for example, using FertiQoL-Treatment Module www.fertiqol.org (10 items) (Boivin et al., 2011b) or the Patient-Centred Care Questionnaire, van Empel et al., 2010 (41 items) developed for infertility care. These assessments could be carried out regularly with patients to monitor service delivery but also evaluate impact of the interventions implemented to reduce burden of treatment.

Even simple interventions like making time for more personalized care (e.g. introducing yourself, establishing the main reason for the visit, providing information about treatment procedures), and asking whether the patient had other issues or concerns, have been shown to differentiate satisfied from dissatisfied infertility patients (Daniluk, 2001; Leite et al., 2005). Interventions designed to address medical staff uncertainty about the right words to use in various contexts have been designed and can easily be adapted to the context of fertility (Platt et al., 2001). A study with ART personnel revealed that about 20% of staff felt inadequately trained to deal with patient complaints at the same time as revealing that an enhanced focus on patients was associated with higher pregnancy success rates (Gerson et al., 2004). A closer collaboration with patients could help identify specific

problems and best solutions to problems in each clinic (Stewart *et al.*, 2001). For example, a significant proportion of patients want their pregnancy test results by telephone rather than at the clinic, a practice which could also result in significant time savings for staff (Stewart *et al.*, 2001). Fertility patients prefer shared decision-making with their health-care team (Peddie *et al.*, 2004) and interventions developed with patients tend to be more likely to motivate organizational change (Bunge *et al.*, 2010). Clinics therefore need to effect change with their patients. As noted previously, this is especially important in accepting that patients and medical staff may not define the optimal treatment trajectory in the same way (Daniluk, 2001; Boivin *et al.*, 2005).

### Targeting treatment factors

Finally, some research suggests that simplifying treatment protocols would help reduce physical demands and minimize disruptions. The pharmacological options and regimens all have strengths and weaknesses. Mild ovarian stimulation protocols aiming to retrieve fewer oocytes reduce physical and emotional stress reactions (Hojgaard *et al.*, 2001; Verberg *et al.*, 2009) and have been shown to significantly reduce the chance of discontinuing from treatment (Verberg *et al.*, 2008). Ovarian stimulation using less complex treatment regimens and fewer injections may also result in a significant reduction in distress (3 versus 23%; Hojgaard *et al.*, 2001). However, the success of milder stimulation regimens may be dependent on the patient's willingness to undergo multiple cycles, as the live birth rate per cycle is lower than for conventional ART (Heijnen *et al.*, 2007). It may be useful to compare outcomes of various interventions (i.e. success rates, burden of treatment and cost) over a given period of time (which may involve multiple cycles) rather than per IVF cycle only (Vail and Gardener, 2003). Pen injection devices may offer significant benefits over syringe delivery in terms of patient convenience, acceptability and tolerance (Craenmehr *et al.*, 2001; Platteau *et al.*, 2003; Sedbon *et al.*, 2006; Christianson *et al.*, 2007; Abbotts *et al.*, 2011), just as the recently introduced sustained follicle stimulant preparations allow for a reduction in the total number of injections (Devroey *et al.*, 2009). Low cost ART is in its infancy and its cost-effectiveness needs to be fully evaluated but presumably it will eventually reduce the financial burden associated with treatment (Fauser *et al.*, 2010). Doctors will mainly guide the choice of regimens. However, shared decision-making would also involve taking into account which regimen would reduce the burden of treatment for a particular patient (Palumbo *et al.*, 2011). Importantly, it is noteworthy that willingness-to-pay studies suggest that people prefer to pay more to improve chances of success (Palumbo *et al.*, 2011). Therefore reduced costs, if they incur reduced chances of success, may not be in line with patient preferences.

## Future directions and Conclusion

To make treatment less onerous for patients and medical teams, we propose an integrated approach that takes into account the patient, the clinic and the treatment and their reciprocal influences on each other (Fig. 1). This integrated approach focuses attention more broadly and allows for better matching of interventions to specific problems (Fig. 2). However, much more needs to be done to identify the challenges that patients and medical teams face. In this opinion article

we used the discontinuation literature to infer what were the causes of burden. However, to support/refute the hypothesis that burden is a cause of discontinuation and a lower quality of life (and potentially other outcomes), we need to identify independent markers of burden (e.g. ratings from FertiQoL optional treatment module, observer ratings of patient–staff communication, number of injections) and investigate whether these predict discontinuation from treatment and quality of life. Alternatively, one could also reduce the source of burden (e.g. using a named nurse programme, improved leaflets) and see whether these are associated with concomitant improvements in discontinuation and quality of life in randomized controlled trials. To date discontinuation studies have relied on survey techniques to question people about discontinuation and its causes. However, other techniques, for example willingness-to-pay methods, could potentially help to investigate these issues in greater depth, establish patient preferences and determine how people view the costs/benefits of treatment. The development and evaluation of interventions, especially complex interventions that involve many components, should follow theory-based intervention guidelines (Campbell *et al.*, 2000; Craig *et al.*, 2008) because such interventions are more likely to reach their therapeutic goals (Boivin, 2003; Michie, 2008). In this article we address burden-related causes of discontinuation. However, we recognize that, for many patients, ending treatment will be a satisfactory choice achieved after consideration of beliefs, values and preferences.

In conclusion, compelling longitudinal research demonstrates that patients are better off and more able to reconstruct their lives if they have had a positive treatment experience (Daniluk, 2001). Fertility clinics can do more in this regard. Clinics have made important strides in improving the efficacy and safety of fertility treatments, and now more attention needs to be given to making treatment less onerous. Altogether, tackling burden in ART will be a considerable endeavour but this needs to be a priority for fertility clinics and industry.

## Acknowledgements

Medical writing and editorial assistance was provided by P. Milner, PhD, of PAREXEL.

## Authors' roles

J.B. drafted the manuscript with input from all authors and all authors participated in the revisions.

## Funding

Medical writing and editorial assistance was funded by Merck Sharp & Dohme Corp., a subsidiary of Merck & Co., Inc., Whitehouse Station, NJ, USA. Responsibility for opinions, conclusions and interpretation of data lies with the authors.

## Conflict of interest

J.B. has received fees and grant support from the following companies: Merck Serono S.A., Merck Serono and Schering Plough. A.D. is a grant recipient from Merck, has received speaking fees from Merck, EMD

Serono, and Ferring, and had been a grant recipient and consultant for Johnson & Johnson. D.S. has received honoraria for participating in speaker's bureaus and advisory boards for EMD Serono, Merck, Femasys, Ferring, Schering Plough, and Organon and Watson. T.H.W. has received fees from Ferring. B.F. has received fees and grant support from the following companies (in alphabetic order): Andromed, Ardana, Ferring, Genovum, Glycotope, Merck Serono, MSD, Organon, Pantharei Bioscience, Philips, PregLem, Schering, Schering Plough, Serono and Wyeth. C.V. has received fees from Merck Serono S.A. and Ferring.

## References

- Aarts JWM, van Empel IWH, Boivin J, Nelen WL. Measuring quality of life in infertility using the FertiQol questionnaire. *Hum Reprod* 2010;**25**:i17.
- Aarts JWM, Huppelschoten AG, van Empel IWH, Boivin J, Verhaak CM, Kremer JAM, Nelen WL. How patient-centred care relates to patients' quality of life and distress: a study in 427 women experiencing infertility. *Hum Reprod*. 2011a [Epub ahead of print 22 November 2011].
- Aarts JWM, van den Haak P, Nelen WLD, Tuil WS, Faber MJ, Kremer JAM. Patient-focused internet interventions in reproductive medicine: A scoping review. *Hum Reprod Update* 2011b [Epub ahead of print 22 November 2011].
- Abbotts C, Salgado-Braga C, Audibert-Gros C. A redesigned follitropin alfa pen injector for infertility: results of a marketed research study. *Patient Prefer Adherence* 2011;**5**:315–331.
- Adamson GD. Global cultural and socioeconomic factors that influence access to assisted reproductive technologies. *Womens Health (Lond Engl)* 2009;**5**:351–358.
- Akyuz A, Seven M, Devran A, Demiralp M. Infertility history: is it a risk factor for postpartum depression in Turkish women? *J Perinat Neonatal Nurs* 2010;**24**:137–145.
- Alper MM, Brinsden PR, Fischer R, Wikland M. Is your IVF programme good? *Hum Reprod* 2002;**17**:8–10.
- Benyamini Y, Gozlan M, Kokia E. Variability in the difficulties experienced by women undergoing infertility treatments. *Fertil Steril* 2005;**83**:275–283.
- Boivin J. Patient–staff communication and its effect on reactions to treatment and treatment failure. In: Van Balen F, Gerrits T, Inhorn M (eds). *Proceedings of Social Science Research on Childlessness in a Global Perspective*. Amsterdam, The Netherlands: SCO-Kohnstam Instituut, 2000.
- Boivin J. A review of psychosocial interventions in infertility. *Soc Sci Med* 2003;**57**:2325–2341.
- Boivin J, Lancaster D. Medical waiting periods: imminence, emotions and coping. *Womens Health (Lond Engl)* 2010;**6**:59–69.
- Boivin J, Takefman JE. Stress level across stages of in vitro fertilization in subsequently pregnant and nonpregnant women. *Fertil Steril* 1995;**64**:802–810.
- Boivin J, Takefman JE. Impact of the in-vitro fertilization process on emotional, physical and relational variables. *Hum Reprod* 1996;**11**:903–907.
- Boivin J, Takefman J, Braverman A. Giving bad news: it's time to stop. In: Macklon N (ed). *Assisted Reproduction in the Complicated Patient*. London: Taylor & Francis, 2005,233–240.
- Boivin J, Griffiths E, Venetis CA. Emotional distress in infertile women and failure of assisted reproductive technologies: meta-analysis of prospective psychosocial studies. *Br Med J* 2011a;**342**:d223.
- Boivin J, Takefman J, Braverman A. The Fertility Quality of Life (FertiQoL) tool: development and general psychometric properties. *Hum Reprod* 2011b;**26**:2084–2091.
- Bouwman CA, Lintsen BA, Al M, Verhaak CM, Eijkemans RJ, Habbema JD, Braat DD, Hakkaart-Van Roijen L. Absence from work and emotional stress in women undergoing IVF or ICSI: an analysis of IVF-related absence from work in women and the contribution of general and emotional factors. *Acta Obstet Gynecol Scand* 2008;**87**:1169–1175.
- Brandes M, van der Steen JO, Bokdam SB, Hamilton CJ, de Bruin JP, Nelen WL, Kremer JA. When and why do subfertile couples discontinue their fertility care? A longitudinal cohort study in a secondary care subfertility population. *Hum Reprod* 2009;**24**:3127–3135.
- Brod M, Hoomans EHM, Wiebinga CJ. Understanding the impact of controlled ovarian stimulation (COS) on women's functioning and well-being. *Hum Reprod* 2007;**22**:i223–i226.
- Brod M, Verhaak CM, Wiebinga CJ, Gerris J, Hoomans EH. Improving clinical understanding of the effect of ovarian stimulation on women's lives. *Reprod Biomed Online* 2009;**18**:391–400.
- Bunge M, Muhlhauser I, Steckelberg A. What constitutes evidence-based patient information? Overview of discussed criteria. *Patient Educ Couns* 2010;**78**:316–328.
- Bunting L, Boivin J. Decision-making about seeking medical advice in an internet sample of women trying to get pregnant. *Hum Reprod* 2007;**22**:1662–1668.
- Callan VJ, Kloske B, Kashima Y, Hennessey JF. Toward understanding women's decisions to continue or stop in vitro fertilization: the role of social, psychological, and background factors. *J In Vitro Fert Embryo Transf* 1988;**5**:363–369.
- Campbell M, Fitzpatrick R, Haines A, Kinmonth AL, Sandercock P, Spiegelhalter D, Tyrer P. Framework for design and evaluation of complex to improve health. *Br Med J* 2000;**321**:694–696.
- Christianson MS, Barker MA, Schouweiler C, Lindheim SR. A retrospective comparison of clinical outcomes and satisfaction using reconstituted recombinant gonadotropins (rFSH) or cartridge rFSH with a pen device in donor oocyte cycles. *Curr Med Res Opin* 2007;**23**:865–870.
- Cousineau TM, Green TC, Corsini EA, Barnard T, Seibring AR, Domar AD. Development and validation of the Infertility Self-Efficacy scale. *Fertil Steril* 2006;**85**:1684–1696.
- Craenmehre E, Bontje PM, Hoomans E, Voortman G, Mannaerts BM. Follitropin-beta administered by pen device has superior local tolerance compared with follitropin-alpha administered by conventional syringe. *Reprod Biomed Online* 2001;**3**:185–189.
- Craig P, Dieppe P, Macintyre S, Michie S, Nazareth I, Petticrew M. Developing and evaluating complex interventions: the new Medical Research Council guidance. *Br Med J* 2008;**337**:a1655.
- Dancet EA, Nelen WL, Sermeus W, De Leeuw L, Kremer JA, D'Hooghe TM. The patients' perspective on fertility care: a systematic review. *Hum Reprod Update* 2010;**16**:467–487.
- Daniluk J. Helping patients cope with infertility. *Clin Obstet Gynecol* 1997;**40**:661–672.
- Daniluk JC. Reconstructing their lives: a longitudinal, qualitative analysis of the transition to biological childlessness for infertile couples. *J Couns Devel* 2001;**79**:439–449.
- de Liz TM, Strauss B. Differential efficacy of group and individual/couple psychotherapy with infertile patients. *Hum Reprod* 2005;**20**:1324–1332.
- Devroey P, Boostanfar R, Koper NP, Mannaerts BM, Ijzerman-Boon PC, Fauser BC. A double-blind, non-inferiority RCT comparing corifollitropin alfa and recombinant FSH during the first seven days of ovarian stimulation using a GnRH antagonist protocol. *Hum Reprod* 2009;**24**:3063–3072.



- Domar AD. Impact of psychological factors on dropout rates in insured infertility patients. *Fertil Steril* 2004;**81**:271–273.
- Domar AD, Smith K, Conboy I, Iannone M, Alper M. A prospective investigation into the reasons why insured United States patients drop out of in vitro fertilization treatment. *Fertil Steril* 2010;**94**:1457–1459.
- Domar AD, Rooney KL, Wiegand B, Orav EJ, Alper MM, Berger BM, Nikolovski J. Impact of a group mind/body intervention on pregnancy rates in IVF patients. *Fertil Steril* 2011;**95**:2269–2273.
- Eisenberg ML, Smith JF, Millstein SG, Nachtigall RD, Adler NE, Pasch LA, Katz PP, Infertility Outcomes Program Project Group. Predictors of not pursuing infertility treatment after an infertility diagnosis: examination of a prospective U.S. cohort. *Fertil Steril* 2010;**94**:2369–2371.
- Elwyn G, Edwards A, Kinnersley P, Grol R. Shared decision making and the concept of equipoise: the competences of involving patients in healthcare choices. *Br J Gen Pract* 2000;**50**:892–899.
- Fauser BC, Nargund G, Andersen AN, Norman R, Tarlatzis B, Boivin J, Ledger W. Mild ovarian stimulation for IVF: 10 years later. *Hum Reprod* 2010;**25**:2678–2684.
- Franco JG Jr, Razera Baruffi RL, Mauri AL, Petersen CG, Felipe V, Garbellini E. Psychological evaluation test after the use of assisted reproduction techniques. *J Assist Reprod Genet* 2002;**19**:274–278.
- Gerson SC, Kemp DE, Balser DP, Masler SN, Hart B, Bubka A, Bonato F. Infertility practice management. I. Leadership and management style: results from the 2002 survey of 374 Society for Assisted Reproductive Technology member centers. *Fertil Steril* 2004;**82**:780–787.
- Groh CJ, Wagner C. The art of communicating ART results: an analysis of infertile couples' experience. *J Reprod Infant Psychol* 2005;**23**:333–346.
- Haagen EC, Hermens RP, Nelen WL, Braat DD, Kremer JA, Grol RP. Subfertile couples' negative experiences with intrauterine insemination care. *Fertil Steril* 2008;**89**:809–816.
- Hammarberg K, Astbury J, Baker H. Women's experience of IVF: a follow-up study. *Hum Reprod* 2001;**16**:374–383.
- Hammer Burns L, Covington SN. Psychology of infertility. In: Covington SN, Hammer Burns L (eds). *Infertility Counseling: A Comprehensive Handbook for Clinicians*. New York, NY: Cambridge University Press, 2006.
- Hämmerli K, Znoj H, Barth J. The efficacy of psychological interventions for infertile patients: a meta-analysis examining mental health and pregnancy rate. *Hum Reprod Update* 2009;**15**:279–295.
- Harris RD, Bond MJ. Stress in IVF workers. *Clin Reprod Fertil* 1987;**5**:27–35.
- Heijnen EM, Eijkemans MJ, De Klerk C, Polinder S, Beckers NG, Klinkert ER, Broekmans FJ, Passchier J, Te Velde ER, Macklon NS et al. A mild treatment strategy for in-vitro fertilisation: a randomised non-inferiority trial. *Lancet* 2007;**369**:743–749.
- Højgaard A, Ingerslev HJ, Dinesen J. Friendly IVF: patient opinions. *Hum Reprod* 2001;**16**:1391–1396.
- Huisman D, Raymakers X, Hoomans EH. Understanding the burden of ovarian stimulation: fertility expert and patient perceptions. *Reprod Biomed Online* 2009;**19**(Suppl 2):5–10.
- Klonoff-Cohen H, Natarajan L. The concerns during assisted reproductive technologies (CART) scale and pregnancy outcomes. *Fertil Steril* 2004;**81**:982–988.
- Kopitzke EJ, Berg BJ, Wilson JF, Owens D. Physical and emotional stress associated with components of the infertility investigation: perspectives of professionals and patients. *Fertil Steril* 1991;**55**:1137–1143.
- Lancastle D, Boivin J. A feasibility study of a brief coping intervention (PRCI) for the waiting period before a pregnancy test during fertility treatment. *Hum Reprod* 2008;**23**:2299–2307.
- Land JA, Courtar DA, Evers JL. Patient dropout in an assisted reproductive technology program: implications for pregnancy rates. *Fertil Steril* 1997;**68**:278–281.
- Lazarus RS, Folkman S. *Stress, Appraisal and Coping*. New York, NY: Springer, 1984.
- Leite RC, Makuch MY, Petta CA, Morais SS. Women's satisfaction with physicians' communication skills during an infertility consultation. *Patient Educ Couns* 2005;**59**:38–45.
- Leushuis E, van der Steeg JW, Steures P, Bossuyt PM, Eijkemans MJ, van der Veen F, Mol BW, Hompes PG. Prediction models in reproductive medicine: a critical appraisal. *Hum Reprod Update* 2009;**15**:537–552.
- Malcolm CE, Cumming DC. Follow-up of infertile couples who dropped out of a specialist fertility clinic. *Fertil Steril* 2004;**81**:269–270.
- Malin M, Hemminki E, Raikkonen O, Sihvo S, Perala ML. What do women want? Women's experience of infertility treatment. *Soc Sci Med* 2001;**53**:123–133.
- Merari D, Chetrit A, Modan B. Emotional reactions and attitudes prior to in vitro fertilization: an inter-spouse study. *Psychol Health* 2002;**17**:629–640.
- Meynol F, Bongain A, Isnard V, Gillet JY. In vitro fertilization refusal after one try. *J Gynecol Obstet Biol Reprod* 1997;**26**(3 suppl):136–138.
- Michie S. Designing and implementing behaviour change interventions to improve population health. *J Health Serv Res Policy* 2008;**13**(suppl 3):64–69.
- Moini A, Salehizadeh S, Moosavi F, Kiani K, Khafri S. Discontinuation decision in assisted reproductive techniques. *Int J Fertil Steril* 2009;**2**:173–178.
- Moran LJ, Brinkworth G, Noakes M, Norman RJ. Effects of lifestyle modification in polycystic ovarian syndrome. *Reprod Biomed Online* 2006;**12**:569–578.
- Mourad SM, Hermens RP, Cox-Witbraad T, Grol RP, Nelen WL, Kremer JA. Information provision in fertility care: a call for improvement. *Hum Reprod* 2009;**24**:1420–1426.
- Ningel K, Strauss B. Psychological diagnosis, counseling and psychotherapy in fertility medicine. In: Strauss B (ed). *Involuntary Childlessness: Psychological Assessment, Counseling, and Psychotherapy*. Seattle, WA: Hogrefe & Huber Publishers, 2002.
- Noar SM, Benac CN, Harris MS. Does tailoring matter? Meta-analytic review of tailored print health behavior on change interventions. *Psychol Bull* 2007;**133**:673–693.
- Okamura K, Bernstein J, Fidler AT. Assessing the quality of infertility resources on the World Wide Web: tools to guide clients through the maze of fact and fiction. *J Midwifery Womens Health* 2002;**47**:264–268.
- Olivius C, Friden B, Borg G, Bergh C. Why do couples discontinue in vitro fertilization treatment? A cohort study. *Fertil Steril* 2004;**81**:258–261.
- Osmanagaoglu K, Tournaye H, Camus M, Vandervorst M, van Steirteghem A, Devroey P. Cumulative delivery rates after intracytoplasmic sperm injection: 5 year follow-up of 498 patients. *Hum Reprod* 1999;**14**:2651–2655.
- Palumbo A, De La Fuente P, Rodriguez M, Sánchez F, Martínez-Salazar J, Muñoz M, Marqueta J, Hernández J, Espallardo O, Polanco C et al. Willingness to pay and conjoint analysis to determine women's preferences for ovarian stimulating hormones in the treatment of infertility in Spain. *Hum Reprod* 2011;**26**:1790–1798.
- Pasch LA. Confronting fertility problems: current research and future challenges. In: Baum A, Revenson T, Singer J (eds). *Handbook of Health Psychology*. Mahwah, NJ: Lawrence Erlbaum Associates, 2001, 559–570.
- Peddie VL, van Teijlingen E, Bhattacharya S. Ending in-vitro fertilization: women's perception's of decision making. *Hum Fertil (Camb)* 2004;**7**:31–37.
- Pinborg A, Hougaard CO, Nyboe AA, Molbo D, Schmidt L. Prospective longitudinal cohort study on cumulative 5-year delivery and adoption rates among 1338 couples initiating infertility treatment. *Hum Reprod* 2009;**24**:991–999.

- Platt FW, Gaspar DL, Coulehan JL, Fox L, Adler AJ, Weston WW, Smith RC, Stewart M. Tell me about yourself: The patient-centered interview. *Ann Intern Med* 2001;**134**:1079–1085.
- Platteau P, Laurent E, Albano C, Osmanagaoglu K, Vernaev V, Tournaye H, Camus M, van Steirteghem A, Devroey P. An open, randomized single-centre study to compare the efficacy and convenience of follitropin beta administered by a pen device with follitropin alpha administered by a conventional syringe in women undergoing ovarian stimulation for IVF/ICSI. *Hum Reprod* 2003;**18**:1200–1204.
- Pook M, Krause W. Stress reduction in male infertility patients: a randomized, controlled trial. *Fertil Steril* 2005;**83**:68–73.
- Rajkhowa M, McConnell A, Thomas GE. Reasons for discontinuation of IVF treatment: a questionnaire study. *Hum Reprod* 2006;**21**:358–363.
- Riiskjaer E, Ammentorp J, Kofoed PE. [Patient satisfaction in relation to organizational conditions]. *Ugeskr Laeger* 2010;**172**:1977–1983.
- Ryan M. Using willingness to pay to assess the benefits of assisted reproductive techniques. *Health Econ* 1996;**5**:543–558.
- Schenker JG. Assisted reproductive practice: religious perspectives. *Reprod Biomed Online* 2005;**10**:310–319.
- Schmidt L, Tjornhoj-Thomsen T, Boivin J, Nyboe AA. Evaluation of a communication and stress management training programme for infertile couples. *Patient Educ Couns* 2005;**59**:252–262.
- Schover LR, Collins RL, Richards S. Psychological aspects of donor insemination: evaluation and follow-up of recipient couples. *Fertil Steril* 1992;**57**:583–590.
- Sedbon E, Wainer R, Perves C. Quality of life of patients undergoing ovarian stimulation with injectable drugs in relation to medical practice in France. *Reprod Biomed Online* 2006;**12**:298–303.
- Sharma V, Allgar V, Rajkhowa M. Factors influencing the cumulative conception rate and discontinuation of in vitro fertilization treatment for infertility. *Fertil Steril* 2002;**78**:40–46.
- Simpson R, Bor R. 'I'm not picking up a heart-beat': experiences of sonographers giving bad news to women during ultrasound scans. *Br J Med Psychol* 2001;**74**:255–272.
- Smeenk JM, Verhaak CM, Stolwijk AM, Kremer JA, Braat DD. Reasons for dropout in an in vitro fertilization/intracytoplasmic sperm injection program. *Fertil Steril* 2004;**81**:262–268.
- Souter VL, Penney G, Hopton JL, Templeton AA. Patient satisfaction with the management of infertility. *Hum Reprod* 1998;**13**:1831–1836.
- Stewart DE, Rosen B, Irvine J, Ritvo P, Shapiro H, Murphy J, Thomas J, Robinson GE, Neuman J, Deber R. The disconnect: infertility patients' information and the role they wish to play in decision making. *Medscape Womens Health* 2001;**6**:1.
- Strauss B, Hepp U, Staeding G, Mettler L. Psychological characteristics of infertile couples: can they predict pregnancy and treatment persistence? *J Comm Appl Soc Psychol* 1998;**8**:289–301.
- Takefman J, Brender W, Boivin J, Tulandi T. Sexual and emotional adjustment of couples undergoing infertility investigation and the effectiveness of preparatory information. *J Psychosom Obstet Gynaecol* 1990;**11**:275–290.
- Vail A, Gardener E. Common statistical errors in the design and analysis of subfertility trials. *Hum Reprod* 2003;**18**:1000–1004.
- Van den Broeck U, Holvoet L, Enzlin P, Bakelants E, Demyttenaere K, D'Hooghe T. Reasons for dropout in infertility treatment. *Gynecol Obstet Invest* 2009;**68**:58–64.
- van Dongen AJ, Verhagen TE, Dumoulin JC, Land JA, Evers JL. Reasons for dropping out from a waiting list for in vitro fertilization. *Fertil Steril* 2010;**94**:1713–1716.
- van Empel IW, Aarts JW, Cohlen BJ, Huppelschoten DA, Laven JS, Nelen WL, Kremer JA. Measuring patient-centredness, the neglected outcome in fertility care: a random multicentre validation study. *Hum Reprod* 2010;**25**:2516–2526.
- Verberg MF, Eijkemans MJ, Heijnen EM, Broekmans FJ, De Klerk C, Fauser BC, Macklon NS. Why do couples drop-out from IVF treatment? A prospective cohort study. *Hum Reprod* 2008;**23**:2050–2055.
- Verberg MF, Macklon NS, Nargund G, Frydman R, Devroey P, Broekmans FJ, Fauser BC. Mild ovarian stimulation for IVF. *Hum Reprod Update* 2009;**15**:13–29.
- Verhaak CM, Smeenk JM, Evers AW, van Minnen A, Kremer JA, Kraaijaat FW. Predicting emotional response to unsuccessful fertility treatment: a prospective study. *J Behav Med* 2005;**28**:181–190.
- Verhaak CM, Smeenk JM, Nahuis MJ, Kremer JA, Braat DD. Long-term psychological adjustment to IVF/ICSI treatment in women. *Hum Reprod* 2007;**22**:305–308.
- Verhaak CM, Lintsen AM, Evers AW, Braat DD. Who is at risk of emotional problems and how do you know? Screening of women going for IVF treatment. *Hum Reprod* 2010;**25**:1234–1240.
- Verhagen TE, Dumoulin JC, Evers JL, Land JA. What is the most accurate estimate of pregnancy rates in IVF dropouts? *Hum Reprod* 2008;**23**:1793–1799.
- White L, McQuillan J, Greil AL, Johnson DR. Infertility: testing a helpseeking model. *Soc Sci Med* 2006;**62**:1031–1041.
- Wischmann T. Implications of psychosocial support in infertility—a critical appraisal. *J Psychosom Obstet Gynaecol* 2008;**29**:83–90.
- Wischmann T, Scherg H, Strowitzki T, Verres R. Psychosocial characteristics of women and men attending infertility counselling. *Hum Reprod* 2009;**24**:378–385.
